# Supplementary material for: Minimal Purkinje Cell-Specific PCP2/L7 Promoter Virally Available for Rodents and Non-human Primates
Source: PubMed Central journal article supplement — Mol Ther Methods Clin Dev. 2017 Jul 27;6:159–70. doi: 10.1016/j.omtm.2017.07.006 (PMC5552061; doi:10.1016/j.omtm.2017.07.006), 2017-07-27
Supplement: mmc1.pdf [file mmc1.pdf]

**OMTM, Volume 6**

**Supplemental Information**

**Minimal Purkinje Cell-Specific PCP2/L7  
Promoter Virally Available for Rodents  
and Non-human Primates**

**Keisuke Nitta, Yasunori Matsuzaki, Ayumu Konno, and Hirokazu Hirai**

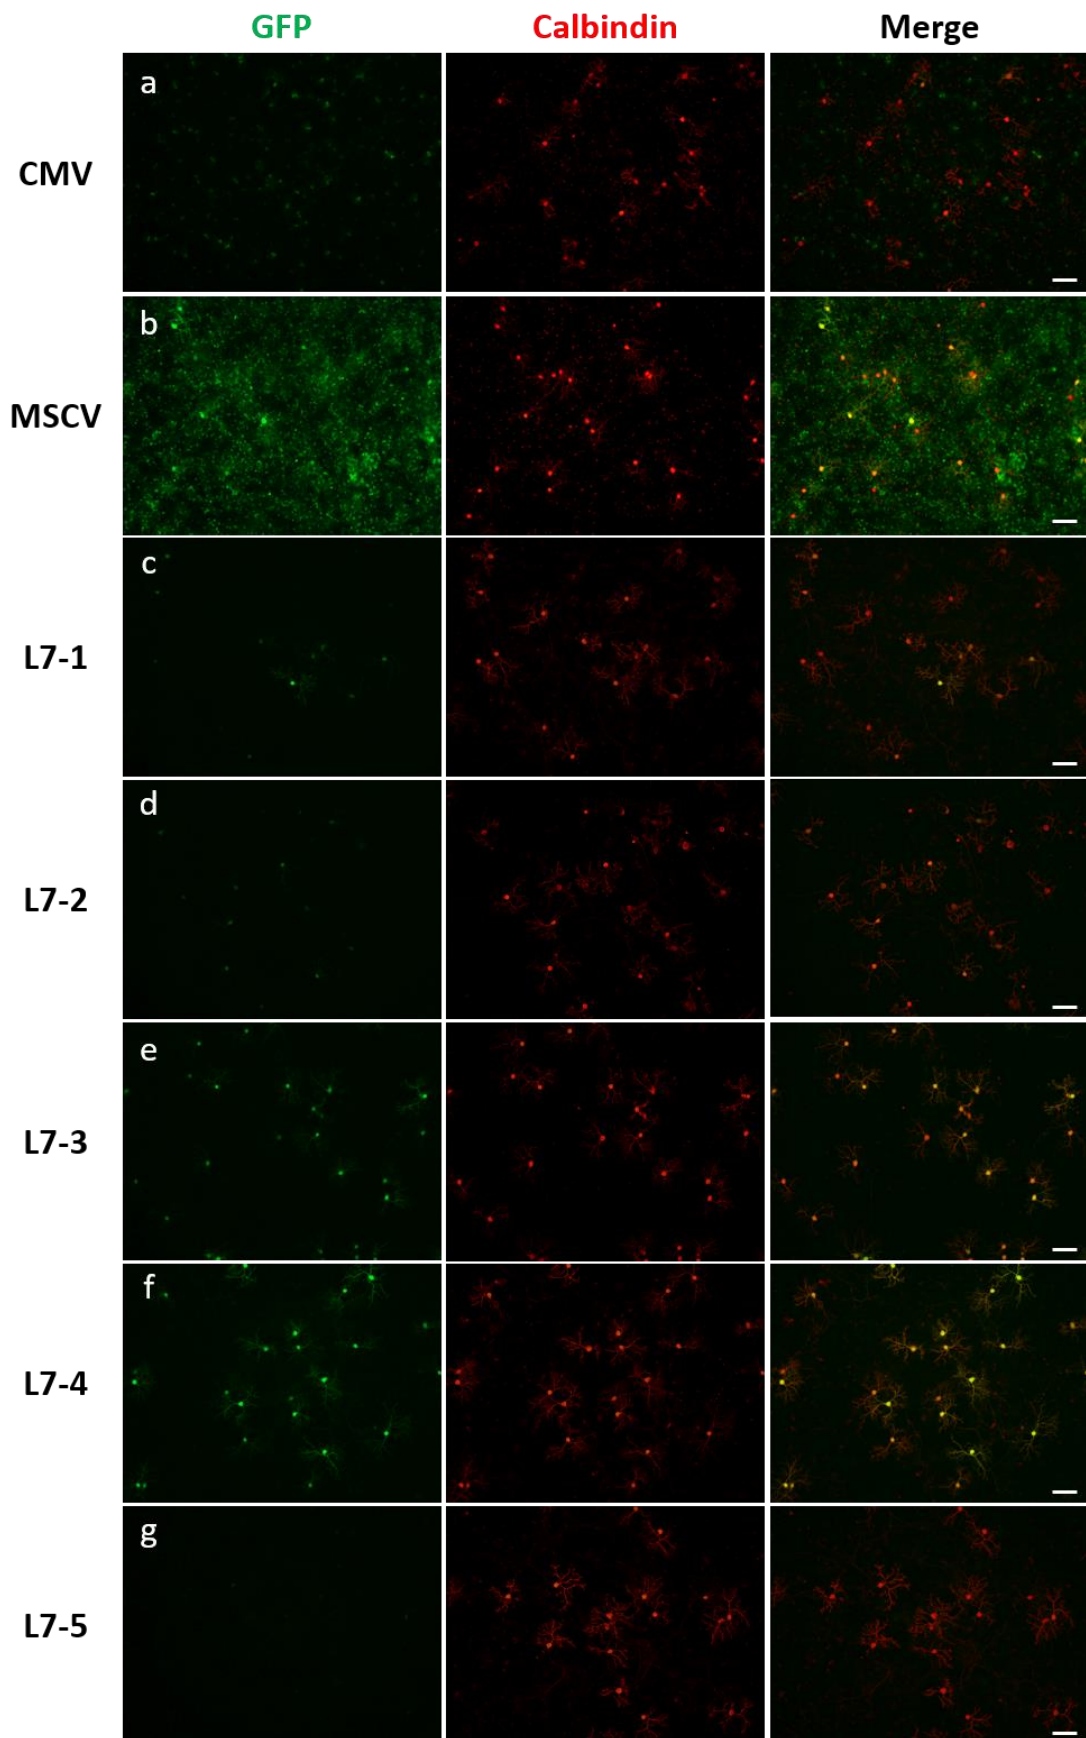

Figure S1

Purkinje cell-specific and upregulated expression of GFP by the deleted L7-3 and L7-4 promoters. Lentiviral vectors expressing GFP under the control of the Purkinje cell-specific L7-1 promoter (c) or different sizes of the deleted promoters (d–g) were infected to rat cerebellar mixed cultures at 0 day *in vitro* (DIV). The ubiquitous CMV (a) and MSCV (b) promoters were used as controls. The cultures were double immunolabeled for GFP (green) and calbindin D-28K (red) at 14 DIV. Note that the culture expressing GFP by L7-3 (e) or L7-4 (f) deleted promoter show more efficient and intense GFP labeling than that by the original L7-1 promoter. Scale bars, 100  $\mu$ m.

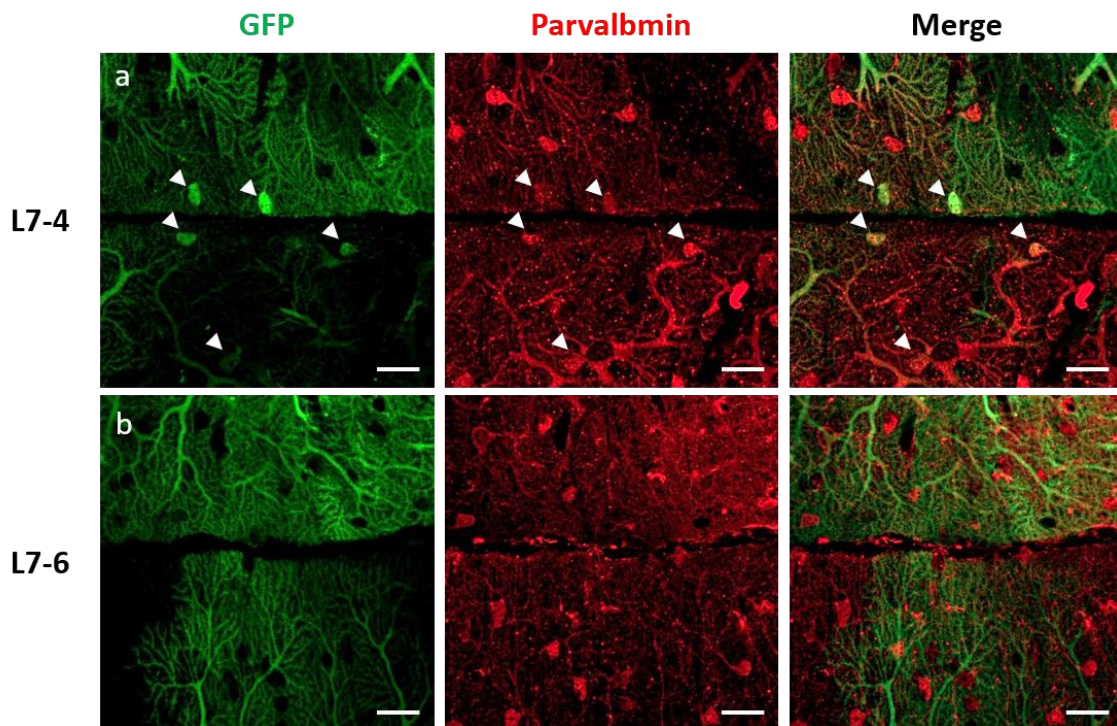

Figure S2

Obvious leakage of the L7-4 promoter activity into stellate cells, in sharp contrast to the absence of the leakage in the L7-6 promoter. Representative images of the cerebellar sagittal sections lentivirally expressing GFP under the control of L7-4 (a) or L7-6 (b). The sections were immunolabeled with GFP and parvalbumin, clearly showing the expression of GFP in stellate cells (arrowheads) by the L7-4 promoter, but not by the L7-6 promoter. Scale bars, 20  $\mu$ m. GFP, green fluorescent protein.

|            |    |                                      |
|------------|----|--------------------------------------|
| mL7-2      | F  | CGAACGCGTGGTTCCACCCTCATGTTGGTTG      |
|            | R  | TCCGAATTCCTTCCCATCACACCCCTTCCCC      |
| mL7-3      | F  | CGAACGCGTTCAGAGCATGGTCAGAAAGCC       |
|            | R  | TCCGAATTCCCGATCGCCCTGCACGTGGGTC      |
| mL7-4      | F  | CGAACGCGTGGTTCCACCCTCATGTTGGTTG      |
|            | R  | TCCGAATTCGATCGCCCTGCACGTGGGTC        |
| mL7-5      | F  | CGAACGCGTTAACACACAGGGGGTATAGGTAG     |
|            | R  | TCCGAATTCGATCGCCCTGCACGTGGGTC        |
| mL7-6      | F  | CGAACGCGTGGTTCCACCCTCATGTTGGTTG      |
|            | R  | TCCGAATTCAGTCCTCACGGGTCTGCAGAATTC    |
| mL7-7      | F  | CGAACGCGTGGTTCCACCCTCATGTTGGTT       |
|            | R  | TCCGAATTCAGGGAAATGGGGCTCAGAAG        |
| mL7-8      | F  | CGAACGCGTGGTTCCACCCTCATGTTGGTT       |
|            | R  | TCCGAATTCATTCATTTGCCCTGAGGAGG        |
| mL7-9      | F  | CGAACGCGTGGTTCCACCCTCATGTTGGTT       |
|            | R  | TCCGAATTCTGTGTATCTCTCCTATACTTTCTCC   |
| mL7-10     | F  | CGAACGCGTGTAAGAGGGCTCTGGCTGACTCC     |
|            | R  | TCCGAATTCAGTCCTCACGGGTCTGCAGAATTC    |
| mL7-11     | F1 | CAAGCTTCGAACGCGTGGTTCCACCC           |
|            | R1 | TTATAGTACTCCAGAGACTTGCTTGCTAATTAG    |
|            | F2 | TCTGGAGTACTATAACACACAGGGGGTATAGGTAGG |
|            | R2 | TGCTCACCATGAATTCAGTCCTC              |
| pAAV mL7-6 | F  | CGACTCGAGGGTTCACCCTCATGTTGGTTG       |
|            | R  | TCCACCGTAGTCCTCACGGGTCTGCAGAAT       |

Table S1

Primer sets used for cloning the L7 deletion constructs.
